# Supplementary material for: Respiratory Symptoms in Relation to Living near a Crude Oil First Treatment Plant in Italy: A Cross-Sectional Study
Source: PubMed Central journal article supplement (PMC6313728; doi:10.3390/ijerph15122636), 2018-11-25
Supplement: ijerph-15-02636-s001.pdf [file ijerph-15-02636-s001.pdf]

## Supplementary Material

# Respiratory Symptoms in Relation to Living Near a Crude Oil First Treatment Plant in Italy: A Cross-Sectional Study

Elisa Bustaffa <sup>1,§</sup>, Alessio Coi <sup>1,§</sup>, Fabrizio Minichilli <sup>1</sup>, Michele Santoro <sup>1</sup>, Renato Prediletto <sup>2</sup>, Simonetta Monti <sup>2</sup>, Ivana Pavlickova <sup>2</sup> and Fabrizio Bianchi <sup>1,\*</sup>

## Method for the sample extraction

From the municipal registries of the two municipalities, 3,641 residents were selected (at 31<sup>th</sup> December 2014) aged 17-73, divided by gender, age class and residential municipality (Tables S1-S4).

**Table S1.** Subjects aged 17-73 residing in Viggiano and Grumento Nova municipalities.

| Municipality  | Number | %    |
|---------------|--------|------|
| Viggiano      | 2393   | 65.7 |
| Grumento Nova | 1248   | 34.3 |
| <i>TOTAL</i>  | 3641   | 100  |

**Table S2.** Gender of subjects aged 17-73 residing in Viggiano and Grumento Nova municipalities.

| Gender       | Number | %    |
|--------------|--------|------|
| Men          | 1833   | 50.3 |
| Women        | 1808   | 49.7 |
| <i>TOTAL</i> | 3641   | 100  |

**Table S3.** Age classes of subjects aged 17-73 residing in Viggiano and Grumento Nova municipalities.

| Age class    | Number | %      |
|--------------|--------|--------|
| 17-26        | 563    | 15.5   |
| 27-36        | 735    | 20.2   |
| 37-46        | 675    | 18.5   |
| 47-56        | 776    | 21.3   |
| 57-66        | 653    | 17.9   |
| 67-73        | 239    | 6.6    |
| <i>TOTAL</i> | 3641   | 100.00 |

**Table S4.** Subjects aged 17-73 residing in Viggiano and Grumento Nova municipalities by municipality, gender and age classes.

| Age class            | Men   |       |       |       |       |       | Women |       |       |       |       |       |
|----------------------|-------|-------|-------|-------|-------|-------|-------|-------|-------|-------|-------|-------|
|                      | 17-26 | 27-36 | 37-46 | 47-56 | 57-66 | 67-73 | 17-26 | 27-36 | 37-46 | 47-56 | 57-66 | 67-73 |
| <b>Viggiano</b>      | 192   | 254   | 251   | 259   | 193   | 64    | 194   | 247   | 205   | 266   | 192   | 76    |
| <b>Grumento Nova</b> | 87    | 130   | 102   | 123   | 124   | 54    | 90    | 104   | 117   | 128   | 144   | 45    |
| <b>TOTAL</b>         | 279   | 384   | 353   | 382   | 317   | 118   | 284   | 351   | 322   | 394   | 336   | 121   |

The sampling was performed several months before the spirometry, in order to avoid to do the spirometric test in those seasons in which the incidence of influenzae and of allergic episodes is higher. Sampling selection referred to an age range 17-73 ensuring the recruitment of a final sample to be submitted to spirometric tests in the age range 18-74.

Subjects residing in the proximal area (PA) were 529 and those residing in the reference area (RA) were 3,112 (Figure S1). The PA and RA boundaries do not match with the municipal ones. As reported in the manuscript PA and RA were defined by an ellipse of major and minor axis of 12 and 4 km, respectively, centered on the plant.

**Figure S1.** Distribution of residents in the municipalities of Viggiano and Grumento Nova in the range of 17-73 years. In light blue subjects residing in the PA. In dark blue subjects residing in the RA.

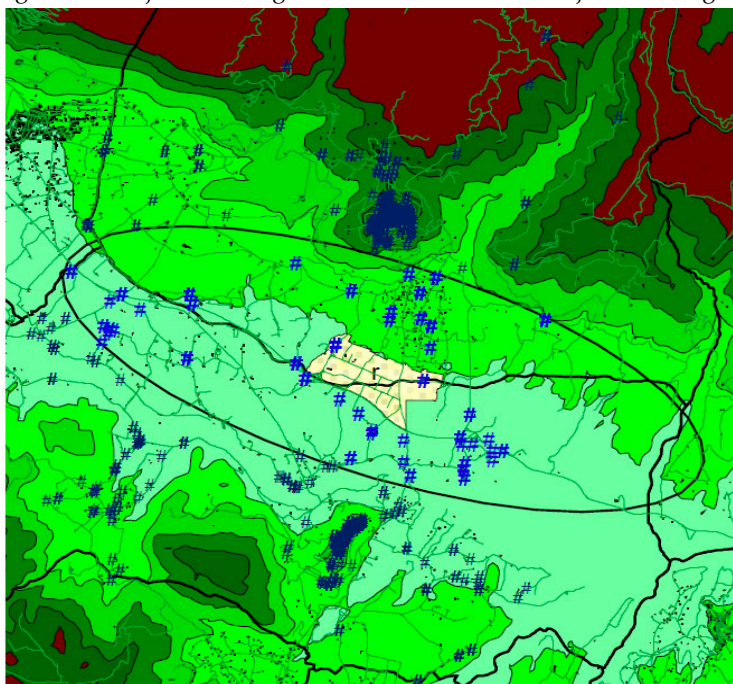

Subjects residing in the PA were divided in age classes, defined considering the tertiles of age, gender and municipality (Table S5).

**Table S5.** Distribution by municipality, gender and tertile of age of residents, aged 17-73, in the municipalities of Viggiano and Grumento Nova, classified as resident in the PA.

| Age class     | Men      |           |           |       | Women     |          |          |       |
|---------------|----------|-----------|-----------|-------|-----------|----------|----------|-------|
|               | 17-35    | 36-53     | 54-73     | Total | 17-35     | 36-53    | 54-73    | Total |
| Viggiano      | 63(11.9) | 63 (11.9) | 56 (10.6) | 182   | 58 (10.9) | 49 (9.3) | 44 (8.3) | 151   |
| Grumento Nova | 30 (5.7) | 33 (6.2)  | 39(7.4)   | 102   | 26 (4.9)  | 31 (5.9) | 37 (7.0) | 94    |
| <b>TOTAL</b>  | 93       | 96        | 95        | 284   | 84        | 80       | 81       | 245   |

Note - In brackets is shown the percentage with respect to the 529 subject residing in the PA.

Therefore, 120 subjects residing in the PA (22.7% on 529) were randomly extracted on the basis of the distribution for municipality-gender-age class. The entity of the sample in each cell was re-calculated distributing the 120 subjects to be extracted on the basis of percentages reported in Table 6.

**Table S6.** Distribution by municipality, gender and tertile of age of residents, aged 17-73 and classified as resident in the PA, of the sample for the study on respiratory function.

| Age class     | Men   |       |       |       | Women |       |       |       |
|---------------|-------|-------|-------|-------|-------|-------|-------|-------|
|               | 17-35 | 36-53 | 54-73 | Total | 17-35 | 36-53 | 54-73 | Total |
| Viggiano      | 14    | 14    | 13    | 41    | 13    | 11    | 10    | 34    |
| Grumento Nova | 7     | 8     | 9     | 24    | 6     | 7     | 8     | 21    |
| <b>TOTAL</b>  | 21    | 22    | 22    | 65    | 19    | 18    | 18    | 55    |

Subjects residing in the RA were divided by age classes, defined considering the tertiles of age, gender and municipality (Table S7).

**Table S7.** Distribution by municipality, gender and tertile of age of residents, aged 17-73, in the municipalities of Viggiano and Grumento Nova, classified as resident in the RA.

| Age class     | Men       |            |            |       | Women      |            |            |       |
|---------------|-----------|------------|------------|-------|------------|------------|------------|-------|
|               | 17-35     | 36-53      | 54-73      | Total | 17-35      | 36-53      | 54-73      | Total |
| Viggiano      | 355(11.4) | 365 (11.7) | 311 (10.0) | 1031  | 354 (11.4) | 352 (11.3) | 323 (10.4) | 1029  |
| Grumento Nova | 171 (5.5) | 150 (4.8)  | 197(6.3)   | 518   | 158 (5.1)  | 170 (5.9)  | 206 (7.0)  | 534   |
| <b>TOTAL</b>  | 526       | 515        | 508        | 1549  | 512        | 522        | 529        | 1563  |

Note - In brackets is shown the percentage with respect to the 3112 subject residing in the RA.

Distribution by age, gender and municipality of subject residing in the RA is similar to that of the residents in the PA. This allowed to extract a sample that reflects the age-gender-municipality distribution of the residents of both the areas (frequency matching).

The numerosity of the extracted sample of subjects residing in in theR is the same of the that of those residing in the PA (120 subjects represent the 3.6% of the total of the subjects residing outside the PA). The sample was randomly extracted for each municipality-gender-age class cell. The numerosity of the sample of each cell was calculated re-distributing the 120 subjects to be extracted on the basis of percentages reported in the previous table. The extracted sample is reported in Table S8.

**Table S8.** Distribution by municipality, gender and tertile of age of residents, aged 17-73 and classified as resident in the RA, of the sample for the study on respiratory function.

| Age class     | Men   |       |       |       | Women |       |       |       |
|---------------|-------|-------|-------|-------|-------|-------|-------|-------|
|               | 17-35 | 36-53 | 54-73 | Total | 17-35 | 36-53 | 54-73 | Total |
| Viggiano      | 14    | 14    | 12    | 40    | 13    | 13    | 12    | 38    |
| Grumento Nova | 7     | 6     | 8     | 21    | 6     | 7     | 8     | 21    |
| <b>TOTAL</b>  | 21    | 20    | 20    | 61    | 19    | 20    | 20    | 59    |

Table S9 shows distribution by municipality, gender and residence area of the analyzed sample.

**Table S9.** Distribution by municipality, gender and residence area of the 191 subjects of the sample used for the descriptive and multivariate analysis.

| Municipality  |              | Men |    | Women |    | Men+Women |     | Men+Women |
|---------------|--------------|-----|----|-------|----|-----------|-----|-----------|
|               |              | PA  | RA | PA    | RA | PA        | REA | Total     |
| Viggiano      | Selected     | 41  | 40 | 34    | 38 | 75        | 78  | 153       |
|               | Study sample | 34  | 35 | 23    | 32 | 57        | 67  | 124       |
| Grumento Nova | Selected     | 24  | 21 | 21    | 21 | 45        | 42  | 87        |
|               | Study sample | 16  | 19 | 18    | 14 | 34        | 33  | 67        |
| Total         | Selected     | 65  | 61 | 55    | 59 | 120       | 120 | 240       |
|               | Study sample | 50  | 54 | 41    | 46 | 91        | 100 | 191       |

Notes: PA: Proximal Area; RA: Reference Area.

Figure S2 shows all the residents. Samples extracted are representative of the spatial distribution within the two sampling areas, adopting a different fraction of sampling aimed at ensuring a greater number of subjects in the PA.

**Figure S2.** Distribution of the sample of the respiratory function study extracted from residents in the municipalities of Viggiano and Grumento Nova ages 17-73, identifying subjects in the PA (yellow) and subjects in the RA (light green).

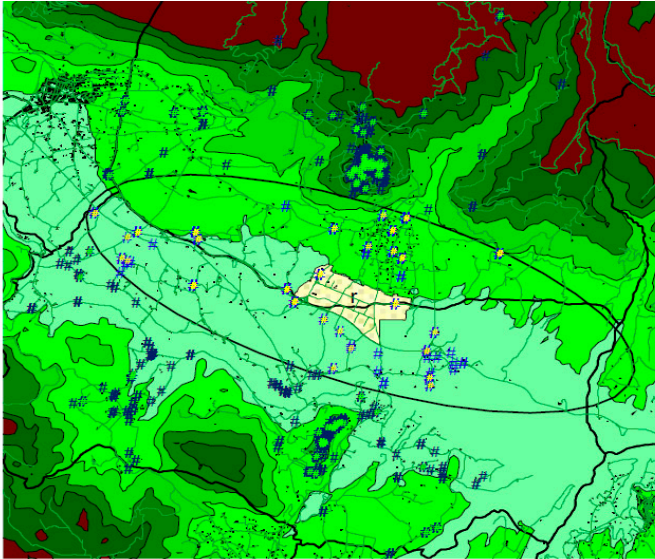

## Spirometry results

Table S10. Results of the spirometry test.

| PERSONAL DATA |          |                |                |                |     |                             | SPIROMETRY |                         |                            |                                  |                |                               |                               |                               |
|---------------|----------|----------------|----------------|----------------|-----|-----------------------------|------------|-------------------------|----------------------------|----------------------------------|----------------|-------------------------------|-------------------------------|-------------------------------|
| IND_COD       | DATE     | AGE<br>(years) | HEIGHT<br>(cm) | WEIGHT<br>(kg) | SEX | BMI<br>(kg/m <sup>2</sup> ) | FVC<br>(L) | FEV <sub>1</sub><br>(L) | FEV <sub>1</sub> /FVC<br>% | FEV <sub>25-75%</sub><br>(L/sec) | PEF<br>(L/sec) | FEF <sub>25%</sub><br>(L/sec) | FEF <sub>50%</sub><br>(L/sec) | FEF <sub>75%</sub><br>(L/sec) |
| VF133         | 02/12/16 | 47             | 159            | 73             | F   | 28.88                       | 111        | 102                     | 79                         | 73                               | 90             | 100                           | 122                           | 50                            |
| VF124         | 02/12/16 | 22             | 158            | 87             | F   | 34.85                       | 116        | 99                      | 74                         | 59                               | 94             |                               | 67                            |                               |
| GM55          | 02/12/16 | 74             | 160            | 90             | M   | 35.16                       | 81         | 72                      | 67                         | 40                               | 60             | 40                            | 38                            | 56                            |
| GF23          | 02/12/16 | 69             | 146            | 65             | F   | 30.49                       | 143        | 153                     | 87                         | 96                               | 125            | 125                           | 97                            | 111                           |
| GF5           | 02/12/16 | 42             | 160            | 63             | F   | 24.61                       | 128        | 127                     | 85                         | 115                              | 122            | 132                           | 146                           | 99                            |
| VM188         | 02/12/16 | 47             | 160            | 55             | M   | 21.48                       | 95         | 95                      | 83                         | 73                               | 94             | 108                           | 94                            | 61                            |
| GF27          | 02/12/16 | 25             | 158            | 60             | F   | 24.03                       | 110        | 112                     | 89                         | 94                               | 84             | 88                            | 99                            | 99                            |
| VM108         | 02/12/16 | 62             | 168            | 107            | M   | 37.91                       | 88         | 105                     | 93                         | 140                              | 104            | 108                           | 154                           | 153                           |
| GF29          | 02/12/16 | 55             | 162            | 55             | F   | 20.96                       | 108        | 103                     | 81                         | 81                               | 89             | 89                            | 80                            | 90                            |
| VM125         | 02/12/16 | 61             | 163            | 91             | M   | 34.25                       | 76         | 59                      | 62                         | 24                               | 79             | 69                            | 24                            | 23                            |
| GM36          | 03/12/16 | 61             | 162            | 108            | M   | 41.15                       | 111        | 119                     | 85                         | 127                              | 99             | 100                           | 141                           | 144                           |
| GM21          | 03/12/16 | 55             | 171            | 69             | M   | 23.60                       | 122        | 123                     | 81                         | 121                              | 99             | 91                            | 144                           | 97                            |
| VF6           | 03/12/16 | 30             | 151            | 55             | F   | 24.12                       | 102        | 102                     | 86                         | 91                               | 105            | 92                            | 107                           | 80                            |
| GM71          | 03/12/16 | 60             | 168            | 99             | M   | 35.08                       | 93         | 93                      | 79                         | 79                               | 66             | 63                            | 83                            | 86                            |
| VF83          | 03/12/16 | 51             | 145            | 65             | F   | 30.92                       | 105        | 111                     | 88                         | 106                              | 104            | 108                           | 116                           | 106                           |
| VF102         | 03/12/16 | 38             | 156            | 55             | F   | 22.60                       | 129        | 126                     | 84                         | 111                              | 122            | 135                           | 132                           | 88                            |
| VM28          | 03/12/16 | 22             | 168            | 67             | M   | 23.74                       | 132        | 139                     | 90                         | 115                              | 80             | 93                            | 114                           | 157                           |
| VF72          | 03/12/16 | 57             | 159            | 75             | F   | 29.67                       | 129        | 133                     | 87                         | 128                              | 116            | 130                           | 158                           | 123                           |
| GM89          | 03/12/16 | 55             | 177            | 81             | M   | 25.85                       | 114        | 117                     | 82                         | 117                              | 122            | 139                           | 130                           | 86                            |
| VM149         | 04/12/16 | 35             | 174            | 119            | M   | 39.31                       | 105        | 106                     | 84                         | 103                              | 141            | 164                           | 129                           | 80                            |
| VM131         | 04/12/16 | 57             | 162            | 65             | M   | 24.77                       | 141        | 145                     | 82                         | 136                              | 141            | 157                           | 179                           | 114                           |
| VF98          | 04/12/16 | 49             | 160            | 53             | F   | 20.70                       | 119        | 118                     | 85                         | 103                              | 114            | 128                           | 105                           | 110                           |
| VM89          | 04/12/16 | 32             | 173            | 75             | M   | 25.06                       | 107        | 98                      | 76                         | 70                               | 93             | 94                            | 76                            | 66                            |

|       |          |    |     |     |   |       |     |     |    |     |     |     |     |     |
|-------|----------|----|-----|-----|---|-------|-----|-----|----|-----|-----|-----|-----|-----|
| VM85  | 04/12/16 | 23 | 174 | 85  | M | 28.08 | 115 | 119 | 88 | 127 | 105 | 123 | 141 | 130 |
| VF65  | 04/12/16 | 61 | 163 | 73  | F | 27.48 | 111 | 101 | 76 | 68  | 94  | 105 | 85  | 51  |
| GF28  | 04/12/16 | 41 | 156 | 64  | F | 26.30 | 123 | 120 | 84 | 97  | 91  | 92  | 113 | 90  |
| GM38  | 04/12/16 | 59 | 168 | 73  | M | 25.86 | 116 | 122 | 84 | 134 | 139 | 153 | 180 | 101 |
| GF43  | 04/12/16 | 35 | 151 | 122 | F | 53.51 | 100 | 98  | 85 | 80  | 112 | 117 | 103 | 61  |
| GM8   | 04/12/16 | 37 | 172 | 85  | M | 28.73 | 127 | 125 | 82 | 116 | 126 | 145 | 141 | 98  |
| VM117 | 05/12/16 | 48 | 177 | 94  | M | 30.00 | 119 | 117 | 80 | 96  | 142 | 161 | 108 | 78  |
| VM71  | 05/12/16 | 32 | 163 | 49  | M | 18.44 | 91  | 102 | 96 | 95  | 59  | 68  | 93  | 169 |
| VF146 | 05/12/16 | 62 | 158 | 72  | F | 28.84 | 122 | 121 | 83 | 106 | 122 | 133 | 119 | 82  |
| GF77  | 05/12/16 | 39 | 150 | 59  | F | 26.22 | 109 | 109 | 85 | 87  | 89  | 96  | 102 | 83  |
| VF49  | 05/12/16 | 41 | 165 | 83  | F | 30.49 | 99  | 88  | 77 | 62  | 76  | 85  | 67  | 53  |
| VF11  | 07/12/16 | 25 | 155 | 52  | F | 21.64 | 104 | 100 | 84 | 76  | 63  | 63  | 76  | 109 |
| VF80  | 07/12/16 | 57 | 171 | 85  | F | 29.07 | 118 | 108 | 77 | 84  | 102 | 110 | 106 | 59  |
| GF40  | 07/12/16 | 46 | 157 | 78  | F | 31.64 | 101 | 109 | 92 | 93  | 104 | 110 | 91  | 118 |
| VM96  | 07/12/16 | 28 | 171 | 74  | M | 25.31 | 103 | 102 | 84 | 93  | 121 | 136 | 103 | 82  |
| GM20  | 07/12/16 | 28 | 178 | 76  | M | 23.99 | 104 | 110 | 89 | 128 | 100 | 118 | 153 | 133 |
| VF99  | 07/12/16 | 35 | 165 | 76  | F | 27.92 | 109 | 109 | 87 | 112 | 115 | 121 | 116 | 110 |
| GF42  | 07/12/16 | 31 | 176 | 75  | F | 24.21 | 121 | 102 | 74 | 74  | 82  | 82  | 86  | 62  |
| GM47  | 07/12/16 | 74 | 162 | 70  | M | 26.67 | 95  | 101 | 80 | 92  | 75  | 79  | 110 | 92  |
| GF37  | 09/12/16 | 19 | 160 | 67  | F | 26.17 | 119 | 117 | 86 | 104 | 99  | 111 | 107 | 95  |
| VF26  | 09/12/16 | 35 | 162 | 73  | F | 27.82 | 127 | 122 | 83 | 116 | 122 | 139 | 155 | 86  |
| GM50  | 09/12/16 | 74 | 162 | 78  | M | 29.72 | 86  | 93  | 83 | 90  | 81  | 88  | 108 | 84  |
| GM64  | 09/12/16 | 27 | 181 | 72  | M | 21.98 | 111 | 119 | 90 | 127 | 101 | 118 | 128 | 134 |
| GF75  | 09/12/16 | 72 | 145 | 65  | F | 30.92 | 141 | 154 | 87 | 146 | 98  | 91  | 138 | 188 |
| GF87  | 09/12/16 | 32 | 165 | 63  | F | 23.14 | 113 | 110 | 84 | 97  | 113 | 122 | 108 | 86  |
| GF57  | 09/12/16 | 62 | 155 | 59  | F | 24.56 | 116 | 112 | 81 | 84  | 115 | 127 | 118 | 68  |
| VM126 | 09/12/16 | 55 | 171 | 77  | M | 26.33 | 107 | 102 | 76 | 75  | 100 | 114 | 96  | 52  |
| GM51  | 09/12/16 | 46 | 179 | 95  | M | 29.65 | 113 | 100 | 72 | 62  | 114 | 130 | 74  | 43  |
| VM136 | 09/12/16 | 66 | 172 | 95  | M | 32.11 | 93  | 76  | 63 | 41  | 83  | 48  | 40  | 40  |
| GM65  | 09/12/16 | 37 | 177 | 97  | M | 30.96 | 105 | 120 | 94 | 164 | 121 | 140 | 167 | 211 |
| GM32  | 10/12/16 | 61 | 163 | 73  | M | 27.48 | 103 | 99  | 77 | 69  | 100 | 96  | 78  | 71  |
| GF60  | 10/12/16 | 58 | 161 | 77  | F | 29.71 | 114 | 103 | 77 | 60  | 85  | 76  | 57  | 65  |
| GF80  | 10/12/16 | 30 | 153 | 53  | F | 22.64 | 105 | 101 | 84 | 81  | 94  | 102 | 94  | 69  |
| GM69  | 10/12/16 | 69 | 162 | 76  | M | 28.96 | 105 | 109 | 80 | 95  | 131 | 146 | 117 | 76  |
| GF82  | 10/12/16 | 59 | 151 | 75  | F | 32.89 | 127 | 134 | 88 | 135 | 93  | 96  | 133 | 166 |
| GM31  | 10/12/16 | 24 | 166 | 74  | M | 26.85 | 104 | 97  | 80 | 69  | 111 | 114 | 76  | 73  |
| GF93  | 10/12/16 | 58 | 148 | 54  | F | 24.65 | 103 | 120 | 97 | 113 | 103 | 101 | 116 | 143 |
| GM06  | 12/12/16 | 28 | 175 | 74  | M | 24.16 | 88  | 86  | 82 | 79  | 59  | 64  | 93  | 75  |
| VF129 | 12/12/16 | 61 | 150 | 74  | F | 32.89 | 115 | 110 | 79 | 69  | 115 | 109 | 90  | 47  |
| VF95  | 12/12/16 | 43 | 157 | 62  | F | 25.15 | 150 | 138 | 79 | 98  | 108 | 111 | 112 | 88  |
| GM85  | 12/12/16 | 38 | 165 | 65  | M | 23.88 | 113 | 111 | 83 | 95  | 98  | 112 | 103 | 96  |
| GF56  | 12/12/16 | 68 | 151 | 89  | F | 39.03 | 104 | 101 | 79 | 54  | 83  | 82  | 66  | 42  |
| VF48  | 12/12/16 | 23 | 167 | 71  | F | 25.46 | 99  | 93  | 82 | 71  | 105 | 114 | 74  | 65  |
| VM106 | 14/12/16 | 31 | 174 | 126 | M | 41.62 | 97  | 98  | 85 | 106 | 130 | 149 | 155 | 75  |
| VF121 | 14/12/16 | 28 | 175 | 67  | F | 21.88 | 103 | 100 | 84 | 97  | 99  | 113 | 121 | 84  |
| GF61  | 14/12/16 | 34 | 161 | 66  | F | 25.46 | 115 | 117 | 88 | 141 | 102 | 102 | 145 | 143 |
| GM76  | 14/12/16 | 57 | 176 | 103 | M | 33.25 | 104 | 100 | 77 | 77  | 110 | 119 | 75  | 75  |
| VM33  | 14/12/16 | 42 | 160 | 74  | M | 28.91 | 119 | 133 | 93 | 154 | 122 | 138 | 194 | 178 |
| GF90  | 15/12/16 | 48 | 160 | 98  | F | 38.28 | 94  | 92  | 84 | 94  | 114 | 105 | 149 | 60  |
| GM19  | 15/12/16 | 66 | 176 | 78  | M | 25.18 | 112 | 104 | 72 | 65  | 96  | 107 | 87  | 40  |
| VF119 | 15/12/16 | 37 | 156 | 69  | F | 28.35 | 105 | 94  | 77 | 61  | 77  | 76  | 76  | 50  |
| VF90  | 15/12/16 | 25 | 159 | 55  | F | 21.76 | 104 | 108 | 90 | 109 | 86  | 97  | 113 | 115 |
| GM84  | 16/12/16 | 27 | 169 | 77  | M | 26.96 | 110 | 117 | 90 | 140 | 92  | 106 | 151 | 177 |
| VM59  | 16/12/16 | 46 | 174 | 107 | M | 35.34 | 118 | 100 | 69 | 61  | 77  | 81  | 66  | 46  |
| VF42  | 16/12/16 | 51 | 164 | 74  | F | 27.51 | 137 | 138 | 86 | 138 | 123 | 134 | 158 | 130 |
| VM19  | 16/12/16 | 28 | 180 | 75  | M | 23.15 | 84  | 82  | 81 | 70  | 100 | 111 | 84  | 56  |
| GM49  | 19/12/16 | 38 | 181 | 104 | M | 31.75 | 101 | 98  | 80 | 73  | 68  | 65  | 68  | 86  |
| GM81  | 19/12/16 | 46 | 170 | 88  | M | 30.45 | 96  | 87  | 75 | 52  | 104 | 115 | 59  | 44  |
| GF79  | 19/12/16 | 38 | 155 | 73  | F | 30.39 | 114 | 109 | 82 | 85  | 105 | 109 | 106 | 71  |
| GM73  | 19/12/16 | 50 | 181 | 122 | M | 37.24 | 110 | 113 | 82 | 112 | 102 | 117 | 110 | 96  |
| GF4   | 21/12/16 | 52 | 154 | 67  | F | 28.25 | 114 | 113 | 84 | 95  | 79  | 67  | 92  | 122 |
| GM35  | 21/12/16 | 29 | 174 | 78  | M | 25.76 | 115 | 118 | 86 | 115 | 108 | 120 | 134 | 114 |
| VF152 | 21/12/16 | 28 | 152 | 51  | F | 22.07 | 101 | 106 | 91 | 94  | 87  | 91  | 103 | 106 |
| VM93  | 21/12/16 | 63 | 167 | 79  | M | 28.33 | 108 | 104 | 76 | 76  | 100 | 85  | 82  | 70  |
| GM83  | 21/12/16 | 50 | 171 | 96  | M | 32.83 | 91  | 73  | 65 | 40  | 89  |     | 40  |     |
| GF70  | 22/12/16 | 54 | 153 | 63  | F | 26.91 | 66  | 72  | 92 | 85  | 89  | 78  | 141 | 59  |
| VM105 | 22/12/16 | 48 | 180 | 100 | M | 30.86 | 99  | 94  | 76 | 72  | 120 | 125 | 72  | 59  |
| VM104 | 22/12/16 | 59 | 167 | 84  | M | 30.12 | 83  | 70  | 67 | 36  | 97  | 89  | 41  | 30  |
| GM92  | 22/12/16 | 30 | 174 | 78  | M | 25.76 | 105 | 94  | 75 | 61  | 129 | 91  | 76  | 50  |
| GF91  | 22/12/16 | 25 | 158 | 61  | F | 24.44 | 127 | 122 | 84 | 104 | 102 | 114 | 123 | 91  |
| VM1   | 22/12/16 | 40 | 172 | 76  | M | 25.69 | 90  | 98  | 90 | 117 | 89  | 65  | 124 | 168 |
| VM17  | 22/12/16 | 26 | 180 | 69  | M | 21.30 | 100 | 101 | 85 | 98  | 105 | 123 | 115 | 94  |
| GM59  | 22/12/16 | 29 | 171 | 83  | M | 28.38 | 109 | 104 | 81 | 88  | 82  | 96  | 109 | 81  |
| VM151 | 22/12/16 | 49 | 171 | 107 | M | 36.59 | 99  | 88  | 72 | 56  | 90  | 86  | 69  | 52  |
| GM63  | 22/12/16 | 20 | 166 | 88  | M | 31.93 | 96  | 85  | 76 | 59  | 68  | 71  | 69  | 60  |

|       |          |    |     |     |   |       |     |     |    |     |     |     |     |     |
|-------|----------|----|-----|-----|---|-------|-----|-----|----|-----|-----|-----|-----|-----|
| VF140 | 23/12/16 | 27 | 157 | 63  | F | 25.56 | 116 | 98  | 74 | 55  | 104 | 104 | 62  | 48  |
| GF13  | 23/12/16 | 62 | 149 | 53  | F | 23.87 | 110 | 99  | 74 | 52  | 66  | 46  | 66  | 43  |
| VM45  | 30/12/16 | 46 | 175 | 80  | M | 26.12 | 98  | 107 | 89 | 149 | 100 | 113 | 142 | 181 |
| GM48  | 30/12/16 | 53 | 160 | 80  | M | 31.25 | 127 | 135 | 87 | 122 | 69  | 78  | 114 | 219 |
| VM15  | 18/10/16 | 18 | 166 | 75  | M | 27.22 | 135 | 113 | 72 | 72  | 93  |     | 79  |     |
| VF7   | 18/10/16 | 44 | 158 | 53  | F | 21.23 | 117 | 118 | 86 | 119 | 118 |     | 140 |     |
| VM20  | 18/10/16 | 39 | 177 | 85  | M | 27.13 | 107 | 104 | 80 | 85  | 124 |     | 99  |     |
| VM4   | 18/10/16 | 60 | 160 | 70  | M | 27.34 | 113 | 113 | 80 | 90  | 151 |     | 122 |     |
| GF25  | 18/10/16 | 40 | 151 | 88  | F | 38.59 | 95  | 96  | 87 | 83  | 85  |     | 114 |     |
| VM12  | 15/11/16 | 65 | 172 | 98  | M | 33.13 | 97  | 99  | 80 | 88  | 128 | 144 | 95  | 72  |
| VF8   | 15/11/16 | 55 | 165 | 89  | F | 32.69 | 101 | 91  | 77 | 68  | 113 | 119 | 107 | 42  |
| VM21  | 15/11/16 | 70 | 171 | 78  | M | 26.67 | 105 | 108 | 79 | 105 | 102 | 107 | 135 | 72  |
| VM23  | 15/11/16 | 72 | 165 | 81  | M | 29.75 | 84  | 69  | 63 | 33  | 68  | 58  | 29  | 33  |
| VF24  | 15/11/16 | 65 | 155 | 61  | F | 25.39 | 108 | 117 | 90 | 152 | 124 | 119 | 189 | 155 |
| VM30  | 15/11/16 | 65 | 175 | 93  | M | 30.37 | 91  | 101 | 86 | 136 | 107 | 118 | 145 | 124 |
| VF35  | 15/11/16 | 60 | 160 | 82  | F | 32.03 | 91  | 90  | 83 | 78  | 88  | 95  | 85  | 66  |
| VF36  | 15/11/16 | 41 | 155 | 95  | F | 39.54 | 98  | 95  | 83 | 74  | 108 | 120 | 85  | 64  |
| VM34  | 15/11/16 | 64 | 168 | 90  | M | 31.89 | 111 | 116 | 82 | 108 | 90  | 100 | 126 | 108 |
| VF145 | 16/11/16 | 28 | 153 | 55  | F | 23.50 | 98  | 100 | 89 | 97  | 88  | 86  | 108 | 98  |
| VM5   | 16/11/16 | 42 | 181 | 87  | M | 26.56 | 112 | 113 | 82 | 109 | 108 | 115 | 132 | 91  |
| VF143 | 16/11/16 | 45 | 156 | 51  | F | 20.96 | 119 | 123 | 88 | 118 | 118 | 110 | 137 | 121 |
| VF137 | 16/11/16 | 68 | 158 | 74  | F | 29.64 | 104 | 108 | 87 | 92  | 108 | 117 | 92  | 118 |
| VM142 | 16/11/16 | 69 | 165 | 80  | M | 29.38 | 80  | 78  | 75 | 53  | 89  | 99  | 58  | 46  |
| VM39  | 16/11/16 | 39 | 172 | 96  | M | 32.45 | 102 | 106 | 86 | 102 | 128 | 143 | 107 | 108 |
| VF147 | 16/11/16 | 38 | 156 | 76  | F | 31.23 | 104 | 107 | 89 | 123 | 108 | 120 | 151 | 112 |
| VF44  | 16/11/16 | 64 | 158 | 79  | F | 31.65 | 126 | 117 | 77 | 77  | 118 | 92  | 93  | 67  |
| VF141 | 16/11/16 | 60 | 150 | 64  | F | 28.44 | 124 | 123 | 83 | 90  | 107 | 107 | 121 | 78  |
| VM120 | 17/11/16 | 59 | 171 | 84  | M | 28.73 | 136 | 127 | 74 | 86  | 147 | 156 | 104 | 63  |
| VM134 | 17/11/16 | 43 | 170 | 74  | M | 25.61 | 118 | 123 | 85 | 140 | 128 | 130 | 181 | 114 |
| VM144 | 17/11/16 | 70 | 167 | 70  | M | 25.10 | 88  | 96  | 84 | 116 | 93  | 73  | 126 | 109 |
| VM118 | 17/11/16 | 55 | 162 | 93  | M | 35.44 | 99  | 95  | 78 | 76  | 76  | 67  | 107 | 54  |
| VF92  | 17/11/16 | 50 | 163 | 94  | F | 35.38 | 120 | 111 | 79 | 81  | 131 | 143 | 95  | 69  |
| GM46  | 17/11/16 | 53 | 174 | 80  | M | 26.42 | 109 | 89  | 65 | 50  | 86  | 68  | 52  | 43  |
| VF135 | 17/11/16 | 34 | 160 | 86  | F | 33.59 | 102 | 105 | 88 | 129 | 141 | 153 | 166 | 110 |
| GF53  | 17/11/16 | 57 | 156 | 70  | F | 28.76 | 128 | 127 | 83 | 105 | 102 | 103 | 135 | 88  |
| VF115 | 17/11/16 | 24 | 156 | 63  | F | 25.89 | 115 | 110 | 83 | 93  | 109 | 121 | 131 | 71  |
| GF2   | 27/11/16 | 64 | 158 | 98  | F | 39.26 | 82  | 77  | 78 | 52  | 98  |     | 78  |     |
| VM56  | 27/11/16 | 29 | 167 | 79  | M | 28.33 | 119 | 124 | 88 | 124 | 86  | 85  | 128 | 175 |
| GM54  | 27/11/16 | 71 | 175 | 83  | M | 27.10 | 96  | 100 | 80 | 92  | 101 | 106 | 98  | 77  |
| VM53  | 27/11/16 | 60 | 172 | 64  | M | 21.63 | 102 | 104 | 73 | 69  | 98  | 109 | 89  | 48  |
| VF43  | 27/11/16 | 20 | 165 | 68  | F | 24.98 | 88  | 93  | 91 | 94  | 74  | 87  | 110 | 119 |
| VF29  | 27/11/16 | 34 | 150 | 54  | F | 24.00 | 116 | 113 | 84 | 88  | 106 | 115 | 120 | 74  |
| VM69  | 27/11/16 | 28 | 185 | 85  | M | 24.84 | 110 | 111 | 84 | 109 | 117 | 131 | 116 | 95  |
| VF47  | 27/11/16 | 56 | 155 | 66  | F | 27.47 | 105 | 105 | 84 | 85  | 92  | 96  | 108 | 69  |
| VF58  | 27/11/16 | 51 | 159 | 92  | F | 36.39 | 113 | 102 | 76 | 65  | 92  | 95  | 84  | 43  |
| GM12  | 27/11/16 | 42 | 181 | 73  | M | 22.28 | 112 | 100 | 73 | 73  | 74  | 84  | 78  | 55  |
| VF75  | 29/11/16 | 66 | 157 | 70  | F | 28.40 | 98  | 94  | 80 | 62  | 94  | 104 | 73  | 43  |
| VM66  | 29/11/16 | 69 | 153 | 57  | M | 24.35 | 140 | 129 | 72 | 66  | 127 | 141 | 96  | 56  |
| VM79  | 29/11/16 | 62 | 171 | 104 | M | 35.57 | 95  | 98  | 81 | 86  | 113 | 123 | 80  | 90  |
| VF78  | 29/11/16 | 43 | 163 | 92  | F | 34.63 | 101 | 92  | 79 | 64  | 108 | 107 | 76  | 56  |
| VM64  | 29/11/16 | 73 | 175 | 88  | M | 28.73 | 91  | 59  | 49 | 26  | 48  | 30  | 22  | 42  |
| GF88  | 29/11/16 | 56 | 155 | 92  | F | 38.29 | 112 | 104 | 78 | 67  | 106 | 106 | 81  | 54  |
| VF74  | 29/11/16 | 47 | 160 | 59  | F | 23.05 | 122 | 118 | 83 | 93  | 136 | 150 | 107 | 81  |
| VM62  | 29/11/16 | 46 | 188 | 101 | M | 28.58 | 95  | 95  | 80 | 95  | 85  | 96  | 119 | 67  |
| GF11  | 29/11/16 | 27 | 160 | 63  | F | 24.61 | 104 | 106 | 89 | 113 | 98  | 98  | 121 | 109 |
| VM67  | 29/11/16 | 35 | 176 | 90  | M | 29.05 | 101 | 102 | 83 | 92  | 108 | 122 | 97  | 93  |
| GF16  | 30/11/16 | 73 | 154 | 86  | F | 36.26 | 85  | 91  | 88 | 78  | 82  | 73  | 80  | 86  |
| VM76  | 30/11/16 | 19 | 180 | 79  | M | 24.38 | 107 | 117 | 91 | 156 | 107 | 113 | 172 | 166 |
| VM77  | 30/11/16 | 51 | 173 | 112 | M | 37.42 | 108 | 104 | 78 | 85  | 99  | 108 | 103 | 63  |
| GM17  | 30/11/16 | 51 | 177 | 98  | M | 31.28 | 98  | 104 | 85 | 151 | 130 | 140 | 198 | 109 |
| VF38  | 30/11/16 | 45 | 160 | 54  | F | 21.09 | 99  | 95  | 82 | 79  | 72  | 78  | 89  | 77  |
| VM55  | 30/11/16 | 52 | 175 | 84  | M | 27.43 | 107 | 101 | 76 | 74  | 120 | 130 | 90  | 66  |
| GM18  | 30/11/16 | 58 | 174 | 88  | M | 29.07 | 119 | 124 | 83 | 132 | 112 | 106 | 138 | 120 |
| VF84  | 30/11/16 | 57 | 156 | 58  | F | 23.83 | 124 | 121 | 82 | 95  | 110 | 116 | 121 | 81  |
| VF73  | 30/11/16 | 26 | 166 | 103 | F | 37.38 | 93  | 91  | 85 | 90  | 97  | 99  | 104 | 75  |
| VM81  | 30/11/16 | 50 | 171 | 84  | M | 28.73 | 91  | 95  | 84 | 98  | 110 | 126 | 121 | 79  |
| VM100 | 01/12/16 | 45 | 180 | 85  | M | 26.23 | 118 | 104 | 71 | 73  | 78  |     | 79  |     |
| VM60  | 01/12/16 | 51 | 170 | 106 | M | 36.68 | 106 | 103 | 78 | 81  | 94  | 101 | 109 | 68  |
| GM22  | 01/12/16 | 45 | 179 | 63  | M | 19.66 | 106 | 103 | 79 | 90  | 77  | 89  | 85  | 92  |
| VM86  | 01/12/16 | 38 | 171 | 82  | M | 28.04 | 105 | 109 | 86 | 103 | 141 | 158 | 63  | 125 |
| VF87  | 01/12/16 | 69 | 171 | 68  | F | 23.26 | 94  | 90  | 80 | 80  | 63  | 66  | 90  | 79  |
| VF10  | 18/11/16 | 55 | 167 | 74  | F | 26.53 | 97  | 76  | 67 | 38  | 82  | 66  | 42  | 31  |
| VF82  | 18/11/16 | 60 | 147 | 79  | F | 36.56 | 122 | 127 | 87 | 107 | 99  | 105 | 119 | 118 |
| VM109 | 18/11/16 | 37 | 187 | 138 | M | 39.46 | 144 | 130 | 79 | 113 | 136 | 163 | 115 | 90  |
| VM132 | 19/11/16 | 36 | 168 | 71  | M | 25.16 | 83  | 75  | 75 | 48  | 85  |     | 56  |     |

|       |          |    |     |    |   |       |     |     |    |     |     |     |     |     |
|-------|----------|----|-----|----|---|-------|-----|-----|----|-----|-----|-----|-----|-----|
| VM107 | 19/11/16 | 50 | 162 | 88 | M | 33.53 | 89  | 91  | 84 | 82  | 84  | 91  | 90  | 90  |
| VF2   | 19/11/16 | 66 | 148 | 60 | F | 27.39 | 117 | 132 | 93 | 132 | 83  | 78  | 133 | 190 |
| VM139 | 20/11/16 | 23 | 174 | 63 | M | 20.81 | 81  | 89  | 93 | 99  | 96  | 110 | 103 | 124 |
| VM148 | 20/11/16 | 46 | 164 | 61 | M | 22.68 | 104 | 100 | 80 | 83  | 109 | 126 | 100 | 61  |
| VM113 | 20/11/16 | 34 | 175 | 82 | M | 26.78 | 119 | 108 | 76 | 79  | 122 | 116 | 87  | 63  |
| VM94  | 20/11/16 | 37 | 174 | 86 | M | 28.41 | 107 | 117 | 90 | 132 | 97  | 112 | 139 | 157 |
| VF70  | 20/11/16 | 52 | 144 | 48 | F | 23.15 | 137 | 130 | 79 | 76  | 96  | 101 | 102 | 62  |
| VM138 | 20/11/16 | 28 | 170 | 63 | M | 21.80 | 106 | 108 | 86 | 100 | 118 | 128 | 98  | 118 |
| VM114 | 20/11/16 | 23 | 183 | 70 | M | 20.90 | 101 | 99  | 82 | 87  | 105 | 102 | 91  | 84  |
| VF128 | 21/11/16 | 57 | 159 | 99 | F | 39.16 | 89  | 103 | 98 | 118 | 65  | 46  | 102 | 237 |
| GF1   | 21/11/16 | 38 | 157 | 65 | F | 26.37 | 125 | 121 | 83 | 99  | 113 | 111 | 120 | 86  |
| GM66  | 21/11/16 | 31 | 171 | 76 | M | 25.99 | 115 | 114 | 83 | 118 | 98  | 113 | 156 | 90  |
| GF33  | 21/11/16 | 64 | 157 | 78 | F | 31.64 | 89  | 92  | 87 | 77  | 70  | 73  | 77  | 89  |
| VM18  | 22/11/16 | 37 | 168 | 98 | M | 34.72 | 105 | 110 | 88 | 106 | 93  | 84  | 107 | 129 |
| VM112 | 22/11/16 | 31 | 188 | 85 | M | 24.05 | 118 | 114 | 97 | 99  | 105 | 114 | 103 | 87  |
| GM30  | 22/11/16 | 72 | 170 | 82 | M | 28.37 | 69  | 62  | 68 | 35  | 63  | 52  | 36  | 46  |
| GM3   | 22/11/16 | 62 | 169 | 60 | M | 21.01 | 105 | 106 | 79 | 96  | 77  | 86  | 123 | 67  |
| GF14  | 22/11/16 | 15 | 169 | 68 | F | 23.81 | 112 | 107 | 83 | 95  | 105 | 119 | 103 | 88  |
| VM26  | 22/11/16 | 51 | 161 | 86 | M | 33.18 | 86  | 60  | 57 | 22  | 87  | 45  | 22  | 25  |
| VF32  | 22/11/16 | 48 | 156 | 88 | F | 36.16 | 96  | 94  | 84 | 76  | 112 | 110 | 108 | 63  |
| VF52  | 22/11/16 | 28 | 155 | 45 | F | 18.73 | 113 | 113 | 87 | 105 | 102 | 111 | 131 | 96  |
| VF51  | 22/11/16 | 24 | 157 | 55 | F | 22.31 | 117 | 113 | 85 | 97  | 84  | 83  | 108 | 93  |
| VM68  | 22/11/16 | 22 | 169 | 73 | M | 25.56 | 94  | 104 | 94 | 117 | 90  | 106 | 126 | 148 |
| VF150 | 23/11/16 | 35 | 156 | 64 | F | 26.30 | 111 | 117 | 90 | 138 | 102 | 114 | 141 | 177 |
| VM37  | 23/11/16 | 41 | 182 | 96 | M | 28.98 | 83  | 89  | 88 | 136 | 121 | 132 | 171 | 109 |
| VM130 | 23/11/16 | 32 | 170 | 92 | M | 31.83 | 85  | 92  | 91 | 132 | 89  | 103 | 147 | 147 |
| VM31  | 23/11/16 | 38 | 178 | 81 | M | 25.56 | 106 | 112 | 88 | 133 | 100 | 108 | 154 | 129 |

Legend – IND\_COD: individual code; BMI: Body Mass Index; FVC: Forced Vital Capacity; FEV<sub>1</sub>: Forced Expiratory Volume in one second; FEV<sub>25-75%</sub>: Forced Expiratory Volume from 25% to 75% of vital capacity; PEF: Peak Expiratory Flow; FEF<sub>25%</sub>: Forced Expiratory Flow at 25% of vital capacity; FEF<sub>50%</sub>: Forced Expiratory Flow at 50% of vital capacity; FEF<sub>75%</sub>: Forced Expiratory Flow at 75% of vital capacity.



## Descriptive analysis Vs outcome

Table S11: Results of the descriptive analysis risk factors versus outcome.

|                                                        |                       | Cough (not due to a common cold) for some periods of the year |            |      |            |       |            |       | Cough (not due to a common cold) for some periods of the year and for at least 2 years |            |     |            |       |            |       | Cough and sputum (not due to a common cold) for some period of the year and for at least 2 years |            |     |            |       |            |       |
|--------------------------------------------------------|-----------------------|---------------------------------------------------------------|------------|------|------------|-------|------------|-------|----------------------------------------------------------------------------------------|------------|-----|------------|-------|------------|-------|--------------------------------------------------------------------------------------------------|------------|-----|------------|-------|------------|-------|
|                                                        |                       | NO                                                            |            | YES  |            | TOTAL |            | p     | NO                                                                                     |            | YES |            | TOTAL |            | p     | NO                                                                                               |            | YES |            | TOTAL |            | p     |
|                                                        |                       | N                                                             | % or mean  | N    | % or mean  | N     | % or mean  |       | N                                                                                      | % or mean  | N   | % or mean  | N     | % or mean  |       | N                                                                                                | % or mean  | N   | % or mean  | N     | % or mean  |       |
| Sex                                                    | M=0                   | 90                                                            | 57.69      | 14   | 40.00      | 104   | 54.45      |       | 94                                                                                     | 55.62      | 10  | 45.45      | 104   | 54.45      |       | 102                                                                                              | 55.74      | 2   | 28.57      | 104   | 54.74      |       |
|                                                        | F=1                   | 66                                                            | 42.31      | 21   | 60.00      | 87    | 45.55      |       | 75                                                                                     | 45.45      | 12  | 54.55      | 87    | 45.55      |       | 81                                                                                               | 44.26      | 5   | 71.43      | 86    | 45.26      |       |
|                                                        | Total                 | 156                                                           | 100.00     | 35   | 100.00     | 191   | 100        | 0.063 | 169                                                                                    | 101.07     | 22  | 100.00     | 191   | 100.00     | 0.375 | 183                                                                                              | 100.00     | 7   | 100.00     | 190   | 100.00     | 0.248 |
| Age                                                    |                       | 156                                                           | 45.38±2.48 | 35   | 49.68±3.97 | 191   | 46.17±2.15 | 0.127 | 169                                                                                    | 45.24±2.34 | 22  | 53.32±4.53 | 191   | 46.17±2.15 | 0.018 | 183                                                                                              | 45.81±2.22 | 7   | 53.57±7.12 | 190   | 46.17±2.15 | 0.183 |
| Body Mass Index                                        |                       | 156                                                           | 27.82±0.76 | 35   | 30.08±1.85 | 191   | 28.23±0.71 | 0.015 | 169                                                                                    | 27.97±0.75 | 22  | 30.26±2.25 | 191   | 28.23±0.71 | 0.043 | 183                                                                                              | 28.11±0.72 | 7   | 30.74±4.93 | 190   | 28.21±0.72 | 0.172 |
| Smoke                                                  | NO=1                  | 78                                                            | 50.32      | 24   | 68.57      | 102   | 53.68      |       | 88                                                                                     | 52.38      | 14  | 63.64      | 102   | 53.68      |       | 96                                                                                               | 52.75      | 5   | 71.43      | 101   | 53.44      |       |
|                                                        | EX=2                  | 31                                                            | 20.00      | 3    | 8.57       | 34    | 17.89      |       | 33                                                                                     | 19.64      | 1   | 4.54       | 34    | 17.90      |       | 34                                                                                               | 18.68      | 0   | 0.00       | 34    | 17.99      |       |
|                                                        | YES=3                 | 46                                                            | 29.68      | 8    | 22.86      | 54    | 28.42      |       | 47                                                                                     | 27.98      | 7   | 31.82      | 54    | 28.42      |       | 52                                                                                               | 28.57      | 2   | 28.57      | 54    | 28.57      |       |
|                                                        | Total                 | 155                                                           | 100.00     | 35   | 100.00     | 190   | 100        | 0.131 | 168                                                                                    | 100.00     | 22  | 100.00     | 190   | 100.00     | 0.241 | 183                                                                                              | 100.00     | 7   | 100.00     | 189   | 100.00     | 0.514 |
| Pack-years                                             |                       | 153                                                           | 9.15±2.72  | 34   | 9.53±6.13  | 187   | 9.22±2.46  | 0.905 | 165                                                                                    | 8.69±2.60  | 22  | 13.2±8.85  | 187   | 9.22±2.46  | 0.245 | 179                                                                                              | 9.28±2.54  | 7   | 8.93±14.11 | 186   | 9.27±2.47  | 0.958 |
| Metabolic comorbidity                                  | NO=0                  | 113                                                           | 72.44      | 25   | 71.43      | 138   | 72.25      |       | 125                                                                                    | 73.96      | 13  | 59.09      | 138   | 72.25      |       | 132                                                                                              | 72.13      | 5   | 71.43      | 137   | 72.11      |       |
|                                                        | YES=1                 | 43                                                            | 27.56      | 10   | 28.57      | 53    | 27.75      |       | 44                                                                                     | 26.04      | 9   | 40.91      | 53    | 27.75      |       | 51                                                                                               | 27.87      | 2   | 28.57      | 53    | 27.89      |       |
|                                                        | Total                 | 156                                                           | 100.00     | 35   | 100        | 191   | 100        | 0.925 | 169                                                                                    | 100.00     | 22  | 100.00     | 191   | 100.00     | 0.234 | 183                                                                                              | 100.00     | 7   | 100.00     | 190   | 100.00     | 1.000 |
| Cardiovascular comorbidity                             | NO=0                  | 107                                                           | 68.59      | 19   | 54.29      | 126.2 | 65.97      |       | 115                                                                                    | 68.05      | 11  | 50.00      | 126   | 65.97      |       | 121                                                                                              | 66.12      | 4   | 57.14      | 125   | 65.79      |       |
|                                                        | YES=1                 | 49                                                            | 31.41      | 16   | 45.71      | 65    | 34.03      |       | 54                                                                                     | 31.95      | 11  | 50.00      | 65    | 34.03      |       | 62                                                                                               | 33.88      | 3   | 42.86      | 65    | 34.21      |       |
|                                                        | Total                 | 156                                                           | 100.00     | 35.2 | 100.00     | 191.2 | 100.00     | 0.176 | 169                                                                                    | 100.00     | 22  | 100.00     | 191   | 100.00     | 0.181 | 183                                                                                              | 100.00     | 7   | 100.00     | 190   | 100.00     | 0.711 |
| Respiratory symptoms in childhood                      | NO=0                  | 125                                                           | 80.13      | 24   | 68.57      | 149   | 78.01      |       | 134                                                                                    | 79.29      | 15  | 68.18      | 149   | 78.01      |       | 144                                                                                              | 78.69      | 4   | 57.14      | 148   | 77.89      |       |
|                                                        | YES=1                 | 31                                                            | 19.87      | 11   | 31.43      | 42    | 21.99      |       | 35                                                                                     | 20.71      | 7   | 31.82      | 42    | 21.99      |       | 39                                                                                               | 21.31      | 3   | 42.86      | 42    | 22.11      |       |
|                                                        | Total                 | 156                                                           | 100        | 35   | 100        | 191   | 100        | 0.174 | 169                                                                                    | 100.00     | 22  | 100.00     | 191   | 100.00     | 0.274 | 183                                                                                              | 100.00     | 7   | 100.00     | 190   | 100.00     | 0.183 |
| Family history of respiratory diseases                 | NO=0                  | 123                                                           | 78.85      | 19   | 54.29      | 142   | 74.35      |       | 131                                                                                    | 77.51      | 11  | 50.00      | 142   | 74.35      |       | 138                                                                                              | 75.41      | 4   | 57.14      | 142   | 74.74      |       |
|                                                        | YES=1                 | 33                                                            | 21.15      | 16   | 45.71      | 49    | 25.65      |       | 38                                                                                     | 22.49      | 11  | 50.00      | 49    | 25.65      |       | 45                                                                                               | 24.59      | 3   | 42.86      | 48    | 25.26      |       |
|                                                        | Total                 | 156                                                           | 100        | 35   | 100        | 191   | 100        | 0.005 | 169                                                                                    | 100.00     | 22  | 100.00     | 191   | 100.00     | 0.009 | 183                                                                                              | 100.00     | 7   | 100.00     | 190   | 100.00     | 0.372 |
| Wood heating                                           | NO=0                  | 78                                                            | 50.32      | 12   | 35.29      | 90    | 47.62      |       | 81                                                                                     | 48.50      | 9   | 40.91      | 90    | 47.62      |       | 88                                                                                               | 48.62      | 2   | 28.57      | 90    | 47.87      |       |
|                                                        | YES=1                 | 77                                                            | 49.68      | 22   | 64.71      | 99    | 52.38      |       | 86                                                                                     | 51.50      | 13  | 59.09      | 99    | 52.38      |       | 93                                                                                               | 51.38      | 5   | 71.43      | 98    | 52.13      |       |
|                                                        | Total                 | 155                                                           | 100.00     | 34   | 100.00     | 189   | 100        | 0.131 | 167                                                                                    | 100.00     | 22  | 100.00     | 189   | 100.00     | 0.651 | 181                                                                                              | 100.00     | 7   | 100.00     | 188   | 100.00     | 0.447 |
| Employed                                               | NO=0                  | 69                                                            | 44.23      | 15   | 42.86      | 84    | 43.98      |       | 75                                                                                     | 44.38      | 9   | 40.91      | 84    | 43.98      |       | 80                                                                                               | 43.72      | 4   | 57.14      | 84    | 44.21      |       |
|                                                        | YES=1                 | 87                                                            | 55.77      | 20   | 57.14      | 107   | 56.02      |       | 94                                                                                     | 55.62      | 13  | 59.09      | 107   | 56.02      |       | 103                                                                                              | 56.28      | 3   | 42.86      | 106   | 55.79      |       |
|                                                        | Total                 | 156                                                           | 100        | 35   | 100        | 191   | 100        | 1.000 | 169                                                                                    | 100.00     | 22  | 100.00     | 191   | 100.00     | 0.822 | 183                                                                                              | 100.00     | 7   | 100.00     | 190   | 100.00     | 0.702 |
| Occupational exposure                                  | NO=0                  | 92                                                            | 58.97      | 22   | 62.86      | 114   | 59.69      |       | 102                                                                                    | 60.36      | 12  | 54.55      | 114   | 59.69      |       | 111                                                                                              | 60.66      | 2   | 28.57      | 113   | 59.47      |       |
|                                                        | YES=1                 | 64                                                            | 41.03      | 13   | 37.14      | 77    | 40.31      |       | 67                                                                                     | 39.64      | 10  | 45.45      | 77    | 40.31      |       | 72                                                                                               | 39.34      | 5   | 71.43      | 77    | 40.53      |       |
|                                                        | Total                 | 156                                                           | 100.00     | 35   | 100.00     | 191   | 100.00     | 0.707 | 169                                                                                    | 100.00     | 22  | 100.00     | 191   | 100.00     | 0.648 | 183                                                                                              | 100.00     | 7   | 100.00     | 190   | 100.00     | 0.122 |
| Employed in industry                                   | NO=0                  | 127                                                           | 81.41      | 30   | 85.71      | 157   | 82.20      |       | 139                                                                                    | 82.25      | 18  | 81.82      | 157   | 82.20      |       | 150                                                                                              | 81.97      | 6   | 85.71      | 156   | 82.11      |       |
|                                                        | YES=1                 | 29                                                            | 18.59      | 5    | 14.29      | 34    | 17.80      |       | 30                                                                                     | 17.75      | 4   | 18.18      | 34    | 17.80      |       | 33                                                                                               | 18.03      | 1   | 14.29      | 34    | 17.89      |       |
|                                                        | Total                 | 156                                                           | 100.00     | 35   | 100.00     | 191   | 100.00     | 0.633 | 169                                                                                    | 100.00     | 22  | 100.00     | 191   | 100.00     | 1.000 | 183                                                                                              | 100.00     | 7   | 100.00     | 190   | 100.00     | 1.000 |
| Level of education                                     | Primary (or lower)    | 20                                                            | 13.07      | 3    | 8.82       | 23    | 12.3       |       | 21                                                                                     | 12.73      | 2   | 9.09       | 23    | 12.3       |       | 19                                                                                               | 12.03      | 4   | 13.79      | 23    | 12.3       |       |
|                                                        | Secondary (or higher) | 133                                                           | 86.93      | 31   | 91.18      | 164   | 87.8       |       | 144                                                                                    | 87.27      | 20  | 90.91      | 164   | 87.70      |       | 139                                                                                              | 87.97      | 25  | 86.21      | 164   | 87.70      |       |
|                                                        | Total                 | 153                                                           | 100.00     | 34   | 100.00     | 187   | 100.10     | 0.495 | 165                                                                                    | 100.00     | 22  | 100.00     | 187   | 100.00     | 0.626 | 158                                                                                              | 100.00     | 29  | 100.00     | 187   | 100.00     | 0.790 |
| Distance from the main road running through the valley | > 500 m               | 129                                                           | 82.69      | 25   | 71.43      | 154   | 80.63      |       | 139                                                                                    | 82.25      | 15  | 68.18      | 154   | 80.63      |       | 134                                                                                              | 82.72      | 20  | 68.97      | 154   | 80.63      |       |
|                                                        | < 500 m               | 27                                                            | 17.31      | 10   | 28.57      | 37    | 19.37      |       | 30                                                                                     | 17.75      | 7   | 31.82      | 37    | 19.37      |       | 28                                                                                               | 17.28      | 9   | 31.03      | 37    | 19.37      |       |
|                                                        | Total                 | 156                                                           | 100.00     | 35   | 100.00     | 191   | 100.00     | 0.128 | 169                                                                                    | 100.00     | 22  | 100.00     | 191   | 100.00     | 0.116 | 162                                                                                              | 100.00     | 29  | 100.00     | 191   | 100.00     | 0.084 |

|                                                        |                       | High-grade dyspnoea (has to stop to take a breath at normal gait on the level) |             |        |             |        |             | Chronic bronchitis |        |             |        |             |     | Bronchial asthma or asthmatic bronchitis |       |        |             |        |             |        |             |       |
|--------------------------------------------------------|-----------------------|--------------------------------------------------------------------------------|-------------|--------|-------------|--------|-------------|--------------------|--------|-------------|--------|-------------|-----|------------------------------------------|-------|--------|-------------|--------|-------------|--------|-------------|-------|
|                                                        |                       | NO                                                                             |             | YES    |             | TOTAL  |             | NO                 |        | YES         |        | TOTAL       |     | NO                                       |       | YES    |             | TOTAL  |             |        |             |       |
|                                                        |                       | N                                                                              | % (or mean) | N      | % (or mean) | N      | % (or mean) | p                  | N      | % (or mean) | N      | % (or mean) | N   | % (or mean)                              | p     | N      | % (or mean) | N      | % (or mean) | N      | % (or mean) | p     |
| Sex                                                    | M=0                   | 98                                                                             | 56.00       | 6      | 37.50       | 104    | 54.45       |                    | 95     | 52.78       | 9      | 81.82       | 104 | 54.45                                    |       | 94     | 54.34       | 10     | 55.56       | 104    | 54.45       |       |
|                                                        | F=1                   | 77                                                                             | 44.00       | 10     | 62.50       | 87     | 45.55       |                    | 85     | 47.22       | 2      | 18.18       | 87  | 45.55                                    |       | 79     | 45.66       | 8      | 44.44       | 87     | 45.55       |       |
|                                                        | Total                 | 175                                                                            | 100.00      | 16     | 100.00      | 191    | 100         | 0.193              | 180    | 100.00      | 11     | 100.00      | 191 | 100.00                                   | 0.069 | 173    | 100.00      | 18     | 100.00      | 191    | 100.00      | 1.000 |
| Age                                                    |                       | 175                                                                            | 45.27±2.27  | 16     | 55.94±4.88  | 191    | 46.17±2.15  | 0.007              | 180    | 45.62±2.21  | 11     | 55.09±9.01  | 191 | 46.17±2.15                               | 0.043 | 173    | 46.39±2.28  | 18     | 44.00±6.81  | 191    | 46.17±2.15  | 0.523 |
| Body Mass Index                                        |                       | 175                                                                            | 27.96±0.73  | 16     | 31.18±2.92  | 191    | 28.23±0.71  | 0.013              | 180    | 28.10±0.73  | 11     | 30.48±3.77  | 191 | 28.23±0.71                               | 0.125 | 173    | 27.94±0.71  | 18     | 31.08±3.22  | 191    | 28.23±0.71  | 0.011 |
| Smoke                                                  | NO=1                  | 92                                                                             | 52.87       | 10     | 62.50       | 102    | 53.68       |                    | 98     | 54.75       | 4      | 36.36       | 102 | 53.68                                    |       | 92     | 53.49       | 10     | 55.55       | 102    | 53.68       |       |
|                                                        | EX=2                  | 31                                                                             | 17.82       | 3      | 18.75       | 34     | 17.90       |                    | 31     | 17.32       | 3      | 27.28       | 34  | 17.89                                    |       | 31     | 18.02       | 3      | 16.67       | 34     | 17.90       |       |
|                                                        | YES=3                 | 51                                                                             | 29.31       | 3      | 18.75       | 54     | 28.42       |                    | 50     | 27.93       | 4      | 36.36       | 54  | 28.42                                    |       | 49     | 28.49       | 5      | 27.78       | 54     | 28.42       |       |
| Total                                                  | 174                   | 100.00                                                                         | 16          | 100.00 | 190         | 100.00 | 0.684       | 179                | 100.00 | 11          | 100.00 | 190         | 100 | 0.439                                    | 172   | 100.00 | 18          | 100.00 | 190         | 100.00 | 1.000       |       |
| Pack-years                                             |                       | 172                                                                            | 8.86±2.38   | 15     | 13.35±15.54 | 187    | 9.22±2.46   | 0.330              | 176    | 8.16±2.25   | 11     | 26.18±22.09 | 187 | 9.22±2.46                                | 0.001 | 170    | 9.26±2.63   | 17     | 8.74±7.28   | 187    | 9.22±2.46   | 0.904 |
| Metabolic comorbidity                                  | NO=0                  | 128                                                                            | 73.14       | 10     | 62.50       | 138    | 72.25       |                    | 134    | 74.44       | 4      | 36.36       | 138 | 72.25                                    |       | 126    | 72.83       | 12     | 66.67       | 138    | 72.25       |       |
|                                                        | YES=1                 | 47                                                                             | 26.86       | 6      | 37.50       | 53     | 27.75       |                    | 46     | 25.56       | 7      | 63.64       | 53  | 27.75                                    |       | 47     | 27.17       | 6      | 33.33       | 53     | 27.75       |       |
|                                                        | Total                 | 175                                                                            | 100.00      | 16     | 100.00      | 191    | 100.00      | 0.558              | 180    | 100.00      | 11     | 100.00      | 191 | 100                                      | 0.028 | 173    | 100.00      | 18     | 100.00      | 191    | 100.00      | 0.713 |
| Cardiovascular comorbidity                             | NO=0                  | 119                                                                            | 68.00       | 7      | 43.75       | 126    | 65.97       |                    | 122    | 67.78       | 4      | 36.36       | 126 | 65.97                                    |       | 115    | 66.47       | 11     | 61.11       | 126    | 65.97       |       |
|                                                        | YES=1                 | 56                                                                             | 32.00       | 9      | 56.25       | 65     | 34.03       |                    | 58     | 32.22       | 7      | 63.64       | 65  | 34.03                                    |       | 58     | 33.53       | 7      | 38.89       | 65     | 34.03       |       |
|                                                        | Total                 | 175                                                                            | 100.00      | 16     | 100.00      | 191    | 100.00      | 0.112              | 180    | 100.00      | 11     | 100.00      | 191 | 100.00                                   | 0.097 | 173    | 100.00      | 18     | 100.00      | 191    | 100.00      | 0.677 |
| Respiratory symptoms in childhood                      | NO=0                  | 135                                                                            | 77.14       | 14     | 87.50       | 149    | 78.01       |                    | 144    | 80.00       | 5      | 45.45       | 149 | 78.01                                    |       | 137    | 79.19       | 12     | 66.67       | 149    | 78.01       |       |
|                                                        | YES=1                 | 40                                                                             | 22.86       | 2      | 12.50       | 42     | 21.99       |                    | 36     | 20.00       | 6      | 54.55       | 42  | 21.99                                    |       | 36     | 20.81       | 6      | 33.33       | 42     | 21.99       |       |
|                                                        | Total                 | 175                                                                            | 100.00      | 16     | 100.00      | 191    | 100.00      | 0.530              | 180    | 100.00      | 11     | 100.00      | 191 | 100.00                                   | 0.016 | 173    | 100.00      | 18     | 100.00      | 191    | 100.00      | 0.236 |
| Family history of respiratory diseases                 | NO=0                  | 131                                                                            | 74.86       | 11     | 68.75       | 142    | 74.35       |                    | 136    | 75.56       | 6      | 54.55       | 142 | 74.35                                    |       | 131    | 75.72       | 11     | 61.11       | 142    | 74.35       |       |
|                                                        | YES=1                 | 44                                                                             | 25.14       | 5      | 31.25       | 49     | 25.65       |                    | 44     | 24.44       | 5      | 45.45       | 49  | 25.65                                    |       | 42     | 24.28       | 7      | 38.89       | 49     | 25.65       |       |
|                                                        | Total                 | 175                                                                            | 100.00      | 16     | 100.00      | 191    | 100.00      | 0.561              | 180    | 100.00      | 11     | 100.00      | 191 | 100.00                                   | 0.153 | 173    | 100.00      | 18     | 100.00      | 191    | 100.00      | 0.254 |
| Wood heating                                           | NO=0                  | 86                                                                             | 49.71       | 4      | 25.00       | 90     | 47.62       |                    | 85     | 47.75       | 5      | 45.45       | 90  | 47.62                                    |       | 81     | 47.37       | 9      | 50.00       | 90     | 47.62       |       |
|                                                        | YES=1                 | 87                                                                             | 50.29       | 12     | 75.00       | 99     | 52.38       |                    | 93     | 52.25       | 6      | 54.55       | 99  | 52.38                                    |       | 90     | 52.63       | 9      | 50.00       | 99     | 52.38       |       |
|                                                        | Total                 | 173                                                                            | 100.00      | 16     | 100.00      | 189    | 100.00      | 0.070              | 178    | 100.00      | 11     | 100.00      | 189 | 100.00                                   | 1.000 | 171    | 100.00      | 18     | 100.00      | 189    | 100.00      | 1.000 |
| Employed                                               | NO=0                  | 80                                                                             | 45.71       | 4      | 25.00       | 84     | 43.98       |                    | 79     | 43.89       | 5      | 45.45       | 84  | 43.98                                    |       | 77     | 44.51       | 7      | 38.89       | 84     | 43.98       |       |
|                                                        | YES=1                 | 95                                                                             | 54.29       | 12     | 75.00       | 107    | 56.02       |                    | 101    | 56.11       | 6      | 54.55       | 107 | 56.02                                    |       | 96     | 55.49       | 11     | 61.11       | 107    | 56.02       |       |
|                                                        | Total                 | 175                                                                            | 100.00      | 16     | 100.00      | 191    | 100.00      | 0.123              | 180    | 100.00      | 11     | 100.00      | 191 | 100.00                                   | 1.000 | 173    | 100.00      | 18     | 100.00      | 191    | 100.00      | 0.804 |
| Occupational exposure                                  | NO=0                  | 106                                                                            | 60.57       | 8      | 50.00       | 114    | 59.69       |                    | 108    | 60.00       | 6      | 54.55       | 114 | 59.69                                    |       | 107    | 61.85       | 7      | 38.89       | 114    | 59.69       |       |
|                                                        | YES=1                 | 69                                                                             | 39.43       | 8      | 50.00       | 77     | 40.31       |                    | 72     | 40.00       | 5      | 45.45       | 77  | 40.31                                    |       | 66     | 38.15       | 11     | 61.11       | 77     | 40.31       |       |
|                                                        | Total                 | 175                                                                            | 100.00      | 16     | 100.00      | 191    | 100.00      | 0.435              | 180    | 100.00      | 11     | 100.00      | 191 | 100.00                                   | 0.758 | 173    | 100.00      | 18     | 100.00      | 191    | 100.00      | 0.077 |
| Employed in industry                                   | NO=0                  | 146                                                                            | 83.43       | 11     | 68.75       | 157    | 82.20       |                    | 147    | 81.67       | 10     | 90.91       | 157 | 82.20                                    |       | 143    | 82.66       | 14     | 77.78       | 157    | 82.20       |       |
|                                                        | YES=1                 | 29                                                                             | 16.57       | 5      | 31.25       | 34     | 17.80       |                    | 33     | 18.33       | 1      | 9.09        | 34  | 17.80                                    |       | 30     | 17.34       | 4      | 22.22       | 34     | 17.80       |       |
|                                                        | Total                 | 175                                                                            | 100.00      | 16     | 100.00      | 191    | 100.00      | 0.169              | 180    | 100.00      | 11     | 100.00      | 191 | 100.00                                   | 0.692 | 173    | 100.00      | 18     | 100.00      | 191    | 100.00      | 0.533 |
| Level of education                                     | Primary (or lower)    | 20                                                                             | 11.63       | 3      | 20          | 23     | 12.3        |                    | 20     | 11.36       | 3      | 27.27       | 23  | 12.3                                     |       | 21     | 12.43       | 2      | 11.11       | 23     | 12.3        |       |
|                                                        | Secondary (or higher) | 152                                                                            | 88.37       | 12     | 80          | 164    | 87.70       |                    | 156    | 88.64       | 8      | 72.73       | 164 | 87.70                                    |       | 148    | 87.57       | 16     | 88.89       | 164    | 87.80       |       |
|                                                        | Total                 | 172                                                                            | 100.00      | 15     | 100.00      | 187    | 100.00      | 0.344              | 176    | 100.00      | 11     | 100.00      | 187 | 100.00                                   | 0.119 | 169    | 100.00      | 18     | 100.00      | 187    | 100.00      | 0.872 |
| Distance from the main road running through the valley | > 500 m               | 144                                                                            | 82.29       | 10     | 62.5        | 154    | 80.63       |                    | 145    | 80.56       | 9      | 81.82       | 154 | 80.63                                    |       | 140    | 80.92       | 14     | 77.78       | 154    | 80.63       |       |
|                                                        | < 500 m               | 31                                                                             | 17.71       | 6      | 37.5        | 37     | 19.37       |                    | 35     | 19.44       | 2      | 18.18       | 37  | 19.37                                    |       | 33     | 19.08       | 4      | 22.22       | 37     | 19.37       |       |
|                                                        | Total                 | 175                                                                            | 100.00      | 16     | 100.00      | 191    | 100.00      | 0.055              | 180    | 100.00      | 11     | 100.00      | 191 | 100.00                                   | 0.918 | 173    | 100.00      | 18     | 100.00      | 191    | 100.00      | 0.748 |

|                                                        |                       | Respiratory allergic symptoms |             |     |             |       | Respiratory allergic symptoms associated with eye symptoms |       |             |            |             |            |     |            |       |
|--------------------------------------------------------|-----------------------|-------------------------------|-------------|-----|-------------|-------|------------------------------------------------------------|-------|-------------|------------|-------------|------------|-----|------------|-------|
|                                                        |                       | NO                            |             | YES |             | TOTAL | NO                                                         |       | YES         |            | TOTAL       | p          |     |            |       |
|                                                        |                       | N                             | % (or mean) | N   | % (or mean) | N     | % (or mean)                                                | N     | % (or mean) | N          | % (or mean) |            |     |            |       |
| Sex                                                    | M=0                   | 75                            | 55.97       | 29  | 50.88       | 104   | 54.45                                                      |       |             |            |             |            |     |            |       |
|                                                        | F=1                   | 59                            | 44.03       | 28  | 49.12       | 87    | 45.55                                                      |       |             |            |             |            |     |            |       |
|                                                        | Total                 | 134                           | 100.00      | 57  | 100.00      | 191   | 100.00                                                     | 0.530 | 115         | 100.00     | 76          | 100.00     | 191 | 100.00     | 0.374 |
| Age                                                    |                       | 134                           | 47.21±2.70  | 57  | 43.72±3.44  | 191   | 46.17±2.15                                                 | 0.144 | 115         | 46.43±2.88 | 76          | 45.76±3.27 | 191 | 46.17±2.15 | 0.764 |
| Body Mass Index                                        |                       | 134                           | 27.86±0.82  | 57  | 29.10±1.42  | 191   | 28.23±0.71                                                 | 0.118 | 115         | 27.64±0.88 | 76          | 29.14±1.19 | 191 | 28.23±0.71 | 0.042 |
| Smoke                                                  | NO=1                  | 67                            | 50.38       | 35  | 61.40       | 102   | 53.68                                                      |       |             |            |             |            |     |            |       |
|                                                        | EX=2                  | 26                            | 19.55       | 8   | 14.04       | 34    | 17.90                                                      |       |             |            |             |            |     |            |       |
|                                                        | YES=3                 | 40                            | 30.08       | 14  | 24.56       | 54    | 28.42                                                      |       |             |            |             |            |     |            |       |
|                                                        | Total                 | 133                           | 100.01      | 57  | 100.00      | 190   | 100.00                                                     | 0.404 | 114         | 100.00     | 76          | 100.00     | 190 | 100.00     | 0.255 |
| Pack-years                                             |                       |                               |             |     |             |       |                                                            |       | 112         | 10.28±3.48 | 75          | 7.64±3.33  | 187 | 9.22±2.46  | 0.302 |
| Metabolic comorbidity                                  | NO=0                  | -                             | -           | -   | -           | -     | -                                                          | -     | -           | -          | -           | -          | -   | -          | -     |
|                                                        | YES=1                 | -                             | -           | -   | -           | -     | -                                                          | -     | -           | -          | -           | -          | -   | -          | -     |
|                                                        | Total                 | -                             | -           | -   | -           | -     | -                                                          | -     | -           | -          | -           | -          | -   | -          | -     |
| Cardiovascular comorbidity                             | NO=0                  | -                             | -           | -   | -           | -     | -                                                          | -     | -           | -          | -           | -          | -   | -          | -     |
|                                                        | YES=1                 | -                             | -           | -   | -           | -     | -                                                          | -     | -           | -          | -           | -          | -   | -          | -     |
|                                                        | Total                 | -                             | -           | -   | -           | -     | -                                                          | -     | -           | -          | -           | -          | -   | -          | -     |
| Respiratory symptoms in childhood                      | NO=0                  | 111                           | 82.84       | 38  | 66.67       | 149   | 78.01                                                      |       |             |            |             |            |     |            |       |
|                                                        | YES=1                 | 23                            | 17.16       | 19  | 33.33       | 42    | 21.99                                                      |       |             |            |             |            |     |            |       |
|                                                        | Total                 | 134                           | 100.00      | 57  | 100.00      | 191   | 100.00                                                     | 0.021 | 115         | 100.00     | 76          | 100.00     | 191 | 100.00     | 0.004 |
| Family history of respiratory diseases                 | NO=0                  | 106                           | 79.10       | 36  | 63.16       | 142   | 74.35                                                      |       |             |            |             |            |     |            |       |
|                                                        | YES=1                 | 28                            | 20.90       | 21  | 36.84       | 49    | 25.65                                                      |       |             |            |             |            |     |            |       |
|                                                        | Total                 | 134                           | 100.00      | 57  | 100.00      | 191   | 100.00                                                     | 0.029 | 115         | 100.00     | 76          | 100.00     | 191 | 100.00     | 0.042 |
| Wood heating                                           | NO=0                  | 62                            | 46.97       | 28  | 49.12       | 90    | 47.62                                                      |       |             |            |             |            |     |            |       |
|                                                        | YES=1                 | 70                            | 53.03       | 29  | 50.88       | 99    | 52.38                                                      |       |             |            |             |            |     |            |       |
|                                                        | Total                 | 132                           | 100.00      | 57  | 100.00      | 189   | 100.00                                                     | 0.874 | 113         | 100.00     | 76          | 100.00     | 189 | 100.00     | 1.000 |
| Employed                                               | NO=0                  | 64                            | 47.76       | 20  | 35.09       | 84    | 43.98                                                      |       |             |            |             |            |     |            |       |
|                                                        | YES=1                 | 70                            | 52.24       | 37  | 64.91       | 107   | 56.02                                                      |       |             |            |             |            |     |            |       |
|                                                        | Total                 | 134                           | 100.00      | 57  | 100.00      | 191   | 100.00                                                     | 0.114 | 115         | 100.00     | 76          | 100.00     | 191 | 100.00     | 0.552 |
| Occupational exposure                                  | NO=0                  | 84                            | 62.29       | 30  | 52.63       | 114   | 59.69                                                      |       |             |            |             |            |     |            |       |
|                                                        | YES=1                 | 50                            | 37.31       | 27  | 47.37       | 77    | 40.31                                                      |       |             |            |             |            |     |            |       |
|                                                        | Total                 | 134                           | 99.60       | 57  | 100.00      | 191   | 100.00                                                     | 0.202 | 115         | 100.00     | 76          | 100.00     | 191 | 100.00     | 0.366 |
| Employed in industry                                   | NO=0                  | 112                           | 83.58       | 45  | 78.95       | 157   | 82.20                                                      |       |             |            |             |            |     |            |       |
|                                                        | YES=1                 | 22                            | 16.42       | 12  | 21.05       | 34    | 17.80                                                      |       |             |            |             |            |     |            |       |
|                                                        | Total                 | 134                           | 100.00      | 57  | 100.00      | 191   | 100.00                                                     | 0.535 | 115         | 100.00     | 76          | 100.00     | 191 | 100.00     | 0.342 |
| Level of education                                     | Primary (or lower)    | 19                            | 14.5        | 4   | 7.14        | 23    | 12.3                                                       |       |             |            |             |            |     |            |       |
|                                                        | Secondary (or higher) | 112                           | 85.50       | 52  | 92.86       | 164   | 87.70                                                      |       |             |            |             |            |     |            |       |
|                                                        | Total                 | 131                           | 100.00      | 56  | 100.00      | 187   | 100.00                                                     | 0.16  | 113         | 100.00     | 74          | 100.00     | 187 | 100.00     | 0.616 |
| Distance from the main road running through the valley | > 500 m               | 107                           | 79.85       | 47  | 82.46       | 154   | 80.63                                                      |       |             |            |             |            |     |            |       |
|                                                        | < 500 m               | 27                            | 20.15       | 10  | 17.54       | 37    | 19.37                                                      |       |             |            |             |            |     |            |       |
|                                                        | Total                 | 134                           | 100.00      | 57  | 100.00      | 191   | 100.00                                                     | 0.677 | 115         | 100.00     | 76          | 100.00     | 191 | 100.00     | 0.633 |

Legend: M: Males; F: Females; N: Number.

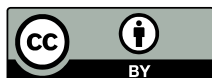

© 2018 by the authors. Submitted for possible open access publication under the terms and conditions of the Creative Commons Attribution (CC BY) license (<http://creativecommons.org/licenses/by/4.0/>).
